# Supplementary material for: Migration dynamics of an important rice pest: The brown planthopper (Nilaparvata lugens) across Asia—Insights from population genomics
Source: PubMed Central journal article supplement (PMC7513714; doi:10.1111/eva.13047), 2020-07-11
Supplement: EVA-13-2449-s001.pdf [file EVA-13-2449-s001.pdf]

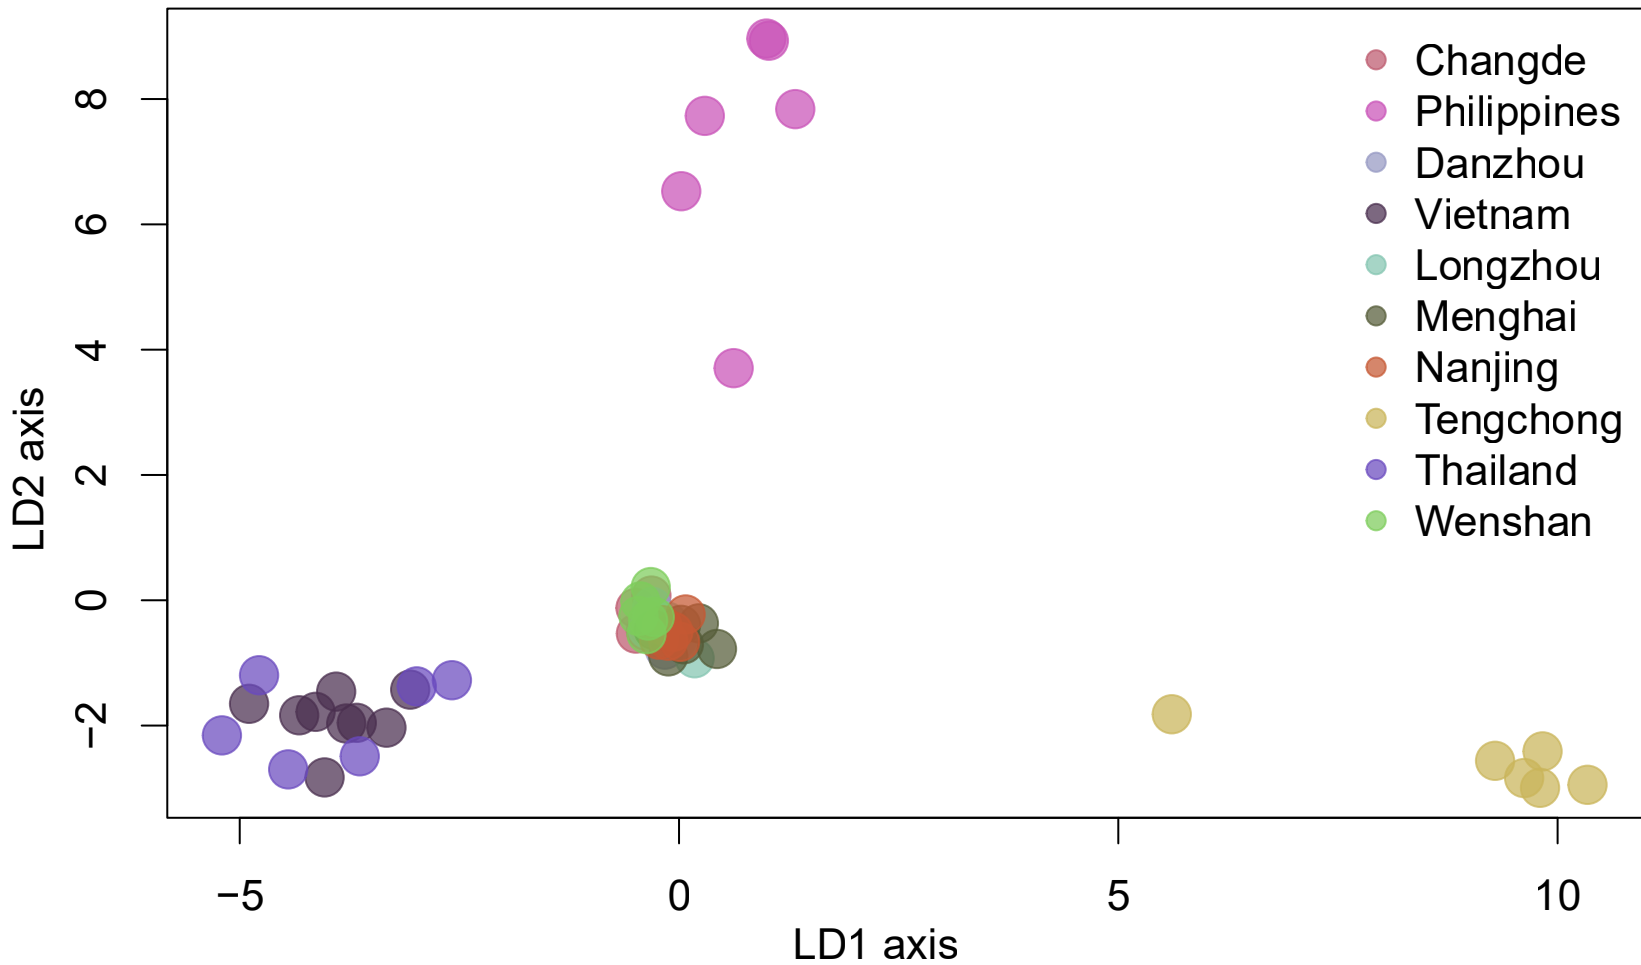

Supplementary Figure 1. Plot of the assignment of the northern populations to the three putative sources, Philippines (top centre), “Indochinese peninsular” (bottom left) and Tengchong (bottom right), using DAPC.
