# Supplementary material for: Migration dynamics of an important rice pest: The brown planthopper (Nilaparvata lugens) across Asia—Insights from population genomics
Source: PubMed Central journal article supplement (PMC7513714; doi:10.1111/eva.13047), 2020-07-11
Supplement: EVA-13-2449-s004.pdf [file EVA-13-2449-s004.pdf]

Supplementary Table 3. Pairwise  $F_{ST}$ 's calculated using Weir & Cockerham 1984 as implemented in hierfstat below the diagonal, with 95% bounds above the diagonal calculated following the bootstrapping procedure implemented in hierfstat with 1,000 replicates.

|             | Changde<br>(China) | Los Banos<br>(Philippines) | Danzhou<br>(China) | Ho Chi Minh<br>(Vietnam) | Longzhou<br>(China) | Menghai<br>(China) | Nanjing<br>(China) | Tengchong<br>(China) | Bangkok<br>(Thailand) | Wenshan<br>(China) |
|-------------|--------------------|----------------------------|--------------------|--------------------------|---------------------|--------------------|--------------------|----------------------|-----------------------|--------------------|
| Changde     |                    | (0.0234 - 0.0242)          | (0.001 - 0.0016)   | (0.0072 - 0.0078)        | (0.0021 - 0.0027)   | (0.0039 - 0.0045)  | (0.0067 - 0.0074)  | (0.016 - 0.0167)     | (0.0067 - 0.0074)     | (0.0018 - 0.0024)  |
| Philippines | 0.0238             |                            | (0.0196 - 0.0204)  | (0.0206 - 0.0213)        | (0.022 - 0.0228)    | (0.0211 - 0.0219)  | (0.0305 - 0.0314)  | (0.0324 - 0.0333)    | (0.021 - 0.0218)      | (0.0189 - 0.0196)  |
| Danzhou     | 0.0013             | 0.0200                     |                    | (0.0019 - 0.0025)        | (0.0002 - 0.0008)   | (0.0007 - 0.0012)  | (0.0071 - 0.0077)  | (0.0093 - 0.0099)    | (0.0016 - 0.0021)     | (0 - 0.0005)       |
| Vietnam     | 0.0075             | 0.0210                     | 0.0022             |                          | (0.002 - 0.0025)    | (0.002 - 0.0025)   | (0.0101 - 0.0107)  | (0.0121 - 0.0127)    | (0.0018 - 0.0023)     | (0.0045 - 0.005)   |
| Longzhou    | 0.0024             | 0.0224                     | 0.0005             | 0.0023                   |                     | (0.0014 - 0.002)   | (0.005 - 0.0057)   | (0.0094 - 0.01)      | (0.003 - 0.0035)      | (0.0021 - 0.0027)  |
| Menghai     | 0.0041             | 0.0215                     | 0.0009             | 0.0022                   | 0.0017              |                    | (0.0086 - 0.0093)  | (0.0069 - 0.0075)    | (0.0016 - 0.0021)     | (0.0019 - 0.0024)  |
| Nanjing     | 0.0071             | 0.0309                     | 0.0074             | 0.0104                   | 0.0054              | 0.0089             |                    | (0.0182 - 0.0189)    | (0.0117 - 0.0124)     | (0.0083 - 0.009)   |
| Tengchong   | 0.0163             | 0.0329                     | 0.0096             | 0.0124                   | 0.0097              | 0.0072             | 0.0186             |                      | (0.0117 - 0.0124)     | (0.0134 - 0.0141)  |
| Thailand    | 0.0070             | 0.0214                     | 0.0018             | 0.0021                   | 0.0032              | 0.0018             | 0.0121             | 0.0120               |                       | (0.0035 - 0.0041)  |
| Wenshan     | 0.0021             | 0.0193                     | 0.0002             | 0.0047                   | 0.0024              | 0.0022             | 0.0086             | 0.0137               | 0.0038                |                    |
